# Supplementary material
Source: PubMed Central journal article supplement (PMC4258444)
Supplement: NIHMS636604-supplement-1.pdf [file NIHMS636604-supplement-1.pdf]

# Supplemental Figure 1

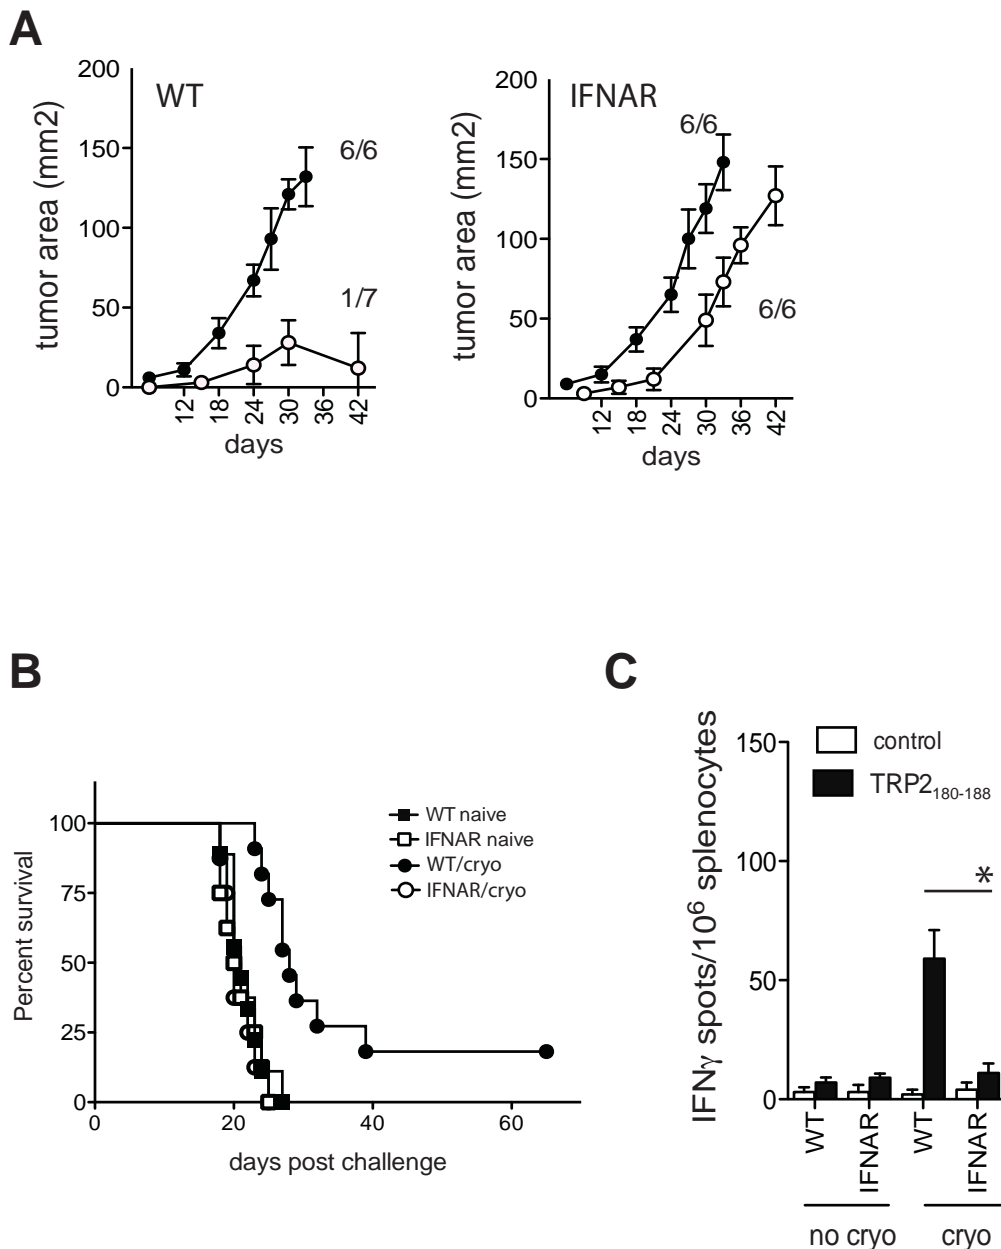

**Figure S1.** Compromised CD8<sup>+</sup> T cell priming to cell-associated antigens in IFNAR<sup>-/-</sup> mice. **A.** WT and IFNAR<sup>-/-</sup> mice were immunized with irradiated OVA-Kb<sup>-/-</sup> splenocytes (open circles) or irradiated Kb<sup>-/-</sup> splenocytes (black circles). Forty days after immunization mice were s.c. challenged with EL-4-mOVA and tumor growth was monitored. Data are expressed as mean  $\pm$  s.e.m with indicated N/group. The X-axis depicts the days after tumor challenge. **B.** WT and IFNAR<sup>-/-</sup> mice were s.c. inoculated with B16/F10. After 10 days tumors were cryo-ablated and mice were challenged 40 days later with B16/F10 cells s.c. (n=11-14/group). Survival curve of WT and IFNAR<sup>-/-</sup> mice upon secondary challenge with B16/F10. **C.** Frequency of TRP-2180-188 specific splenic T cells as determined by ELISPOT 7 days after cryoablation. Representative data of one experiment (of 3) are shown (mean  $\pm$  s.e.m, n=8-12).

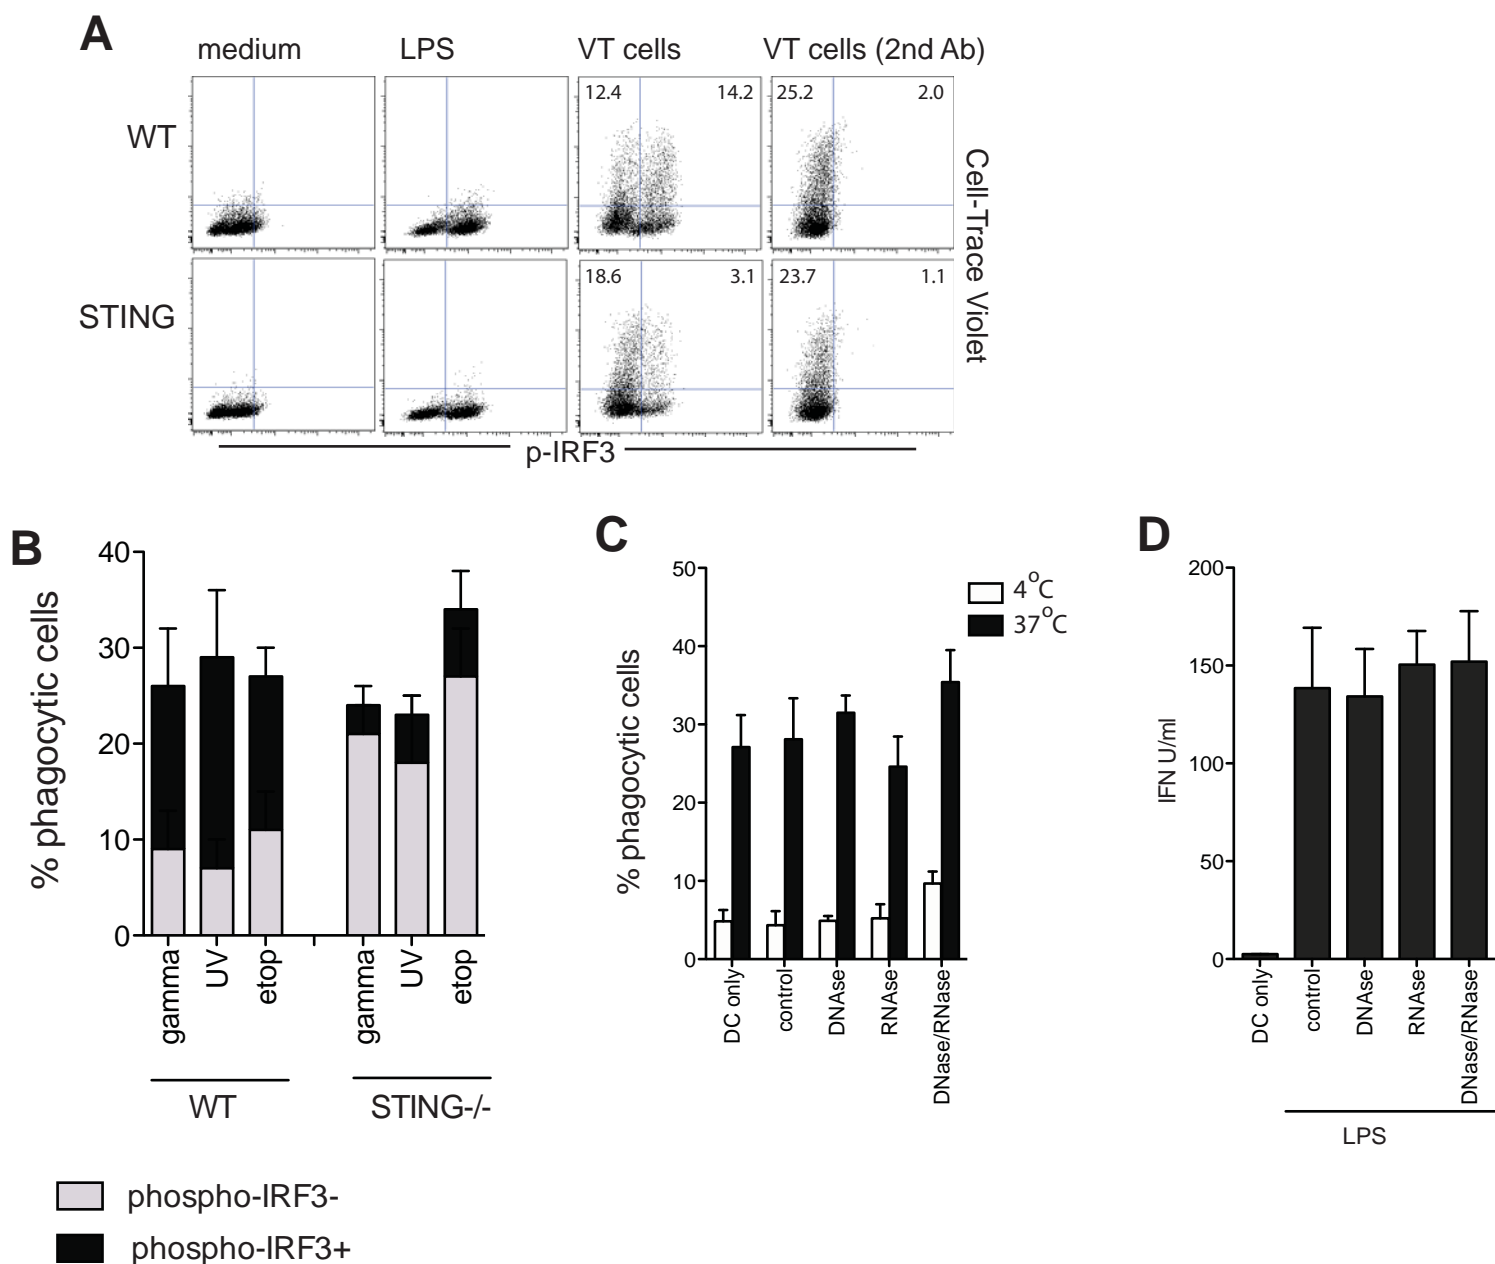

**Figure S2.** Phagocytosis, IRF3 phosphorylation and type I IFN induction by WT and STING<sup>-/-</sup> DCs. **A.** Flow cytometric analysis of phagocytosis and p-IRF3 in WT and STING<sup>-/-</sup> DCs. Purified WT and STING<sup>-/-</sup> DCs were cultured with CellTrace Violet-labeled irradiated IRF3<sup>-/-</sup> cells for 8 hr and phagocytosis and IRF3 phosphorylation was determined by flow cytometry. A representative set of one (out of 4 mice) is shown. **B.** Similar as in A, frequency of WT and STING<sup>-/-</sup> DCs with p-IRF3 staining within the DCs population that has phagocytosed CellTrace Violet material. CellTrace Violet cells were treated with gamma irradiation, UV irradiation or etoposide (5mM). **C.** Purified WT DCs were cultured at 4°C (white bars) and 37°C (black bars) with CellTrace Violet-labeled irradiated splenocytes in the presence or absence of RNases and DNases. Uptake of CellTrace Violet materials was determined 6 hr later by flow cytometry. Data is expressed as percentage of DCs that contain CellTrace Violet. **D.** Type I IFN production by purified WT DCs upon overnight stimulation with LPS in the presence of DNases/RNases. Data are expressed as mean ± s.e.m with n=4.

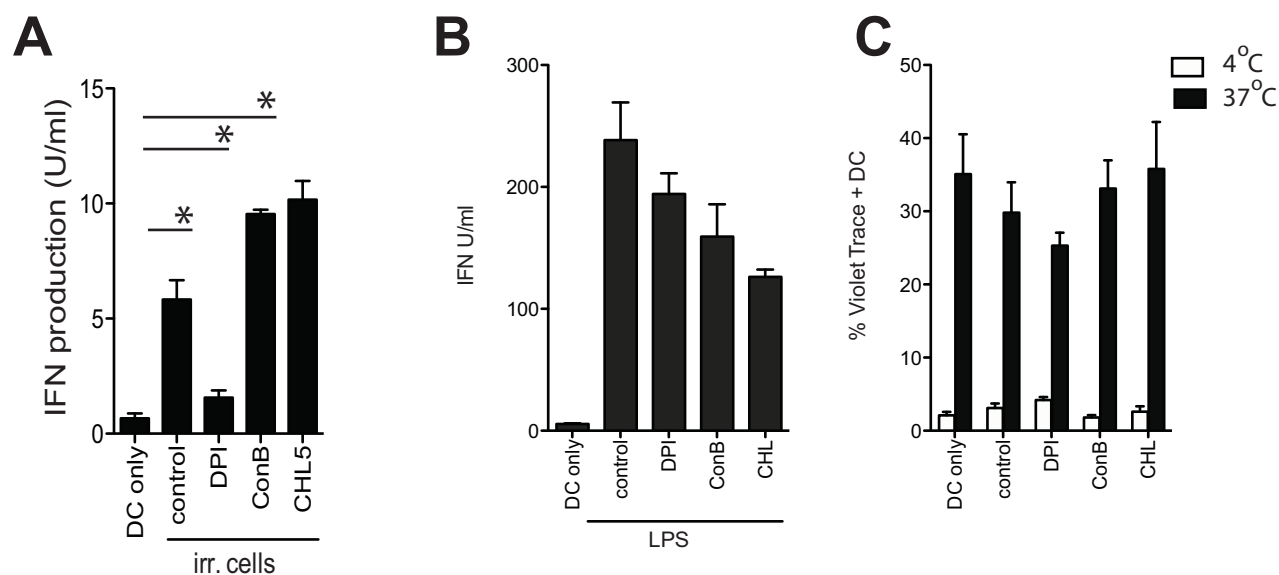

**Figure S3.** Lysosomal acidification rate determines IFN production. **A.** Type I IFN production by purified WT DCs upon stimulation with irradiated cells in the presence of diphenyliodonium (DPI; acceleration of phagosomal acidification) or inhibitors of lysosomal acidification (Chloroquine and ConB). **B.** Type I IFN production by purified WT DCs upon overnight stimulation with LPS in the presence of indicated agents. **C.** Purified WT DCs were cultured at 4°C (white bars) and 37°C (black bars) with CellTrace Violet-labeled irradiated splenocytes in the presence or absence of indicated agents. Uptake of CellTrace Violet materials was determined 6 hr later by flow cytometry. Data are expressed as mean  $\pm$  s.e.m with n=4.
